# Supplementary material for: Cascadable all-optical NAND gates using diffractive networks
Source: PubMed Central journal article supplement (PMC9065113; doi:10.1038/s41598-022-11331-4), 2022-05-03
Supplement: 41598_2022_11331_MOESM1_ESM.pdf [file 41598_2022_11331_MOESM1_ESM.pdf]

# Cascadable all-optical NAND gates using diffractive networks

*Yi Luo*<sup>1,2,3</sup> e-mail: [ylo2016@ucla.edu](mailto:ylo2016@ucla.edu)

*Deniz Mengu*<sup>1,2,3</sup> e-mail: [denizmengu@g.ucla.edu](mailto:denizmengu@g.ucla.edu)

*Aydogan Ozcan*<sup>1,2,3\*</sup> e-mail: [ozcan@ucla.edu](mailto:ozcan@ucla.edu)

<sup>1</sup>Electrical and Computer Engineering Department, University of California, Los Angeles, California 90095, USA

<sup>2</sup>Bioengineering Department, University of California, Los Angeles, California 90095, USA

<sup>3</sup>California Nano Systems Institute (CNSI), University of California, Los Angeles, California 90095, USA

\*Correspondence: Prof. Aydogan Ozcan

E-mail: [ozcan@ucla.edu](mailto:ozcan@ucla.edu)

Address: 420 Westwood Plaza, Engr. IV 68-119, UCLA, Los Angeles, CA 90095, USA

Tel: +1(310)825-0915

Fax: +1(310)206-4685

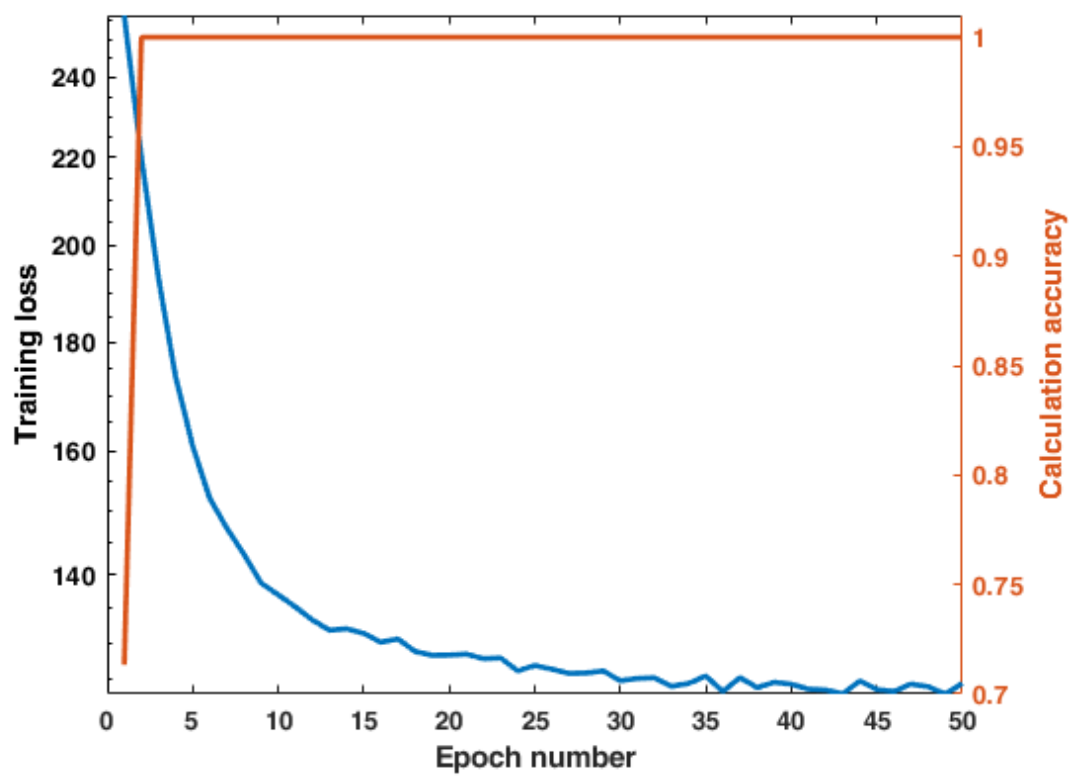

Supplementary Figure S1. Training log of the diffractive NAND gate.
